# Supplementary material for: ZnS/CdX (X = S, Se, Te) core/shell nanowires: an attempt at tuning the electronic bandgaps and SQ efficiencies
Source: Royal Society of Chemistry journal article supplement (doi:10.1039/d0tc05574c), 2021-01-01
Supplement: d0tc05574c1.pdf [file d0tc05574c1.pdf]

## **ZnS/CdX (X = S, Se, Te) core/shell nanowires: An attempt at fine-tuning electronic bandgaps and SQ efficiencies**

Rishit S. Shukla<sup>a</sup>, Vidit B. Zala<sup>a</sup>, Sanjeev K. Gupta<sup>b,\*</sup>, P. N. Gajjar<sup>a,\*</sup>

<sup>a</sup>Department of Physics, University School of Sciences, Gujarat University,  
Ahmedabad 380 009, India

<sup>b</sup>Computational Materials and Nanoscience Group, Department of Physics,  
St. Xavier's College, Ahmedabad 380009, India

\*Corresponding author: [pngajjar@gujaratuniversity.ac.in](mailto:pngajjar@gujaratuniversity.ac.in) (Prof. P.N. Gajjar) and  
[Sanjeev.gupta@sxca.edu.in](mailto:Sanjeev.gupta@sxca.edu.in) (Dr. Sanjeev K. Gupta)

**Table S1.** The static dielectric constants and the energy spectrum for negative values of real part of dielectric constants in the perpendicular and parallel cases, for all the pristine and c/s NWs.

| Nanowire | Perpendicular Optical Vector |                                                 | Parallel Optical Vector   |                                                     |
|----------|------------------------------|-------------------------------------------------|---------------------------|-----------------------------------------------------|
|          | $\epsilon_{\perp}(0)$        | Energy range for $\epsilon_{\perp}(\omega) < 0$ | $\epsilon_{\parallel}(0)$ | Energy range for $\epsilon_{\parallel}(\omega) < 0$ |
| ZnS      | 2.70                         | 8.42 eV – 9.32 eV                               | 2.51                      | 8.66 eV – 9.36 eV                                   |
| CdS      | 2.53                         | 8.14 eV – 8.72 eV                               | 2.32                      | 8.26 eV – 8.76 eV                                   |
| CdSe     | 2.73                         | 7.72 eV – 8.38 eV                               | 2.45                      | 7.84 eV – 8.40 eV                                   |
| CdTe     | 2.98                         | 6.64 eV – 7.66 eV                               | 2.76                      | 6.68 eV – 8.16 eV                                   |
| ZnS/CdS  | 2.69                         | 8.18 eV – 8.94 eV                               | 2.47                      | 8.58 eV – 9.00 eV                                   |
| ZnS/CdSe | 3.42                         | --                                              | 2.69                      | 8.90 eV – 9.40 eV                                   |
| ZnS/CdTe | 4.23                         | 8.54 eV – 8.80 eV                               | 3.21                      | 6.94 eV – 8.94 eV                                   |

**Table S2.** The static refractive indices and the maximum refractive indices of the pristine and c/s NWs, for both the parallel and perpendicular optical vectors.

| Nanowire | Perpendicular Optical Vector |                         | Parallel Optical Vector |                             |
|----------|------------------------------|-------------------------|-------------------------|-----------------------------|
|          | $n_{\perp}(0)$               | $n_{\perp max}(\omega)$ | $n_{\parallel}(0)$      | $n_{\parallel max}(\omega)$ |
| ZnS      | 1.64                         | 2.22 at 2.77 eV         | 1.58                    | 2.12 at 4.47 eV             |
| CdS      | 1.59                         | 2.06 at 2.15 eV         | 1.52                    | 1.80 at 4.34 eV             |
| CdSe     | 1.65                         | 2.20 at 2.02 eV         | 1.57                    | 1.91 at 3.65 eV             |
| CdTe     | 1.72                         | 2.33 at 2.21 eV         | 1.66                    | 2.26 at 3.48 eV             |
| ZnS/CdS  | 1.64                         | 2.16 at 2.25 eV         | 1.57                    | 1.98 at 4.36 eV             |
| ZnS/CdSe | 1.85                         | 2.29 at 1.56 eV         | 1.64                    | 1.91 at 3.25 eV             |
| ZnS/CdTe | 2.06                         | 2.78 at 2.28 eV         | 1.79                    | 2.14 at 2.75 eV             |

**Table S3.** The maxima of the extinction coefficients and the skin depths, for perpendicular and parallel incidents, of the pristine and c/s NWs.

| Nanowire | Perpendicular Optical Vector |                              | Parallel Optical Vector     |                                  |
|----------|------------------------------|------------------------------|-----------------------------|----------------------------------|
|          | $K_{\perp max}(\omega)$      | $\delta_{\perp}(\text{\AA})$ | $K_{\parallel max}(\omega)$ | $\delta_{\parallel}(\text{\AA})$ |
| ZnS      | 1.64                         | 217                          | 1.58                        | 217                              |
| CdS      | 1.59                         | 198                          | 1.52                        | 230                              |
| CdSe     | 1.65                         | 219                          | 1.57                        | 242                              |
| CdTe     | 1.72                         | 278                          | 1.66                        | 378                              |
| ZnS/CdS  | 1.64                         | 192                          | 1.57                        | 234                              |
| ZnS/CdSe | 1.85                         | 586                          | 1.64                        | 259                              |
| ZnS/CdTe | 2.06                         | 416                          | 1.79                        | 242                              |

**Table S4.** The static reflectances and the maximum reflectances of the pristine and c/s NWs, for both the parallel and perpendicular optical vectors.

| Nanowire        | Perpendicular Optical Vector |                         | Parallel Optical Vector |                             |
|-----------------|------------------------------|-------------------------|-------------------------|-----------------------------|
|                 | $R_{\perp}(0)$               | $R_{\perp max}(\omega)$ | $R_{\parallel}(0)$      | $R_{\parallel max}(\omega)$ |
| <b>ZnS</b>      | 5.93%                        | 28.09% at 9.08 eV       | 5.11%                   | 21.90% at 8.85 eV           |
| <b>CdS</b>      | 5.22%                        | 32.33% at 8.43 eV       | 4.29%                   | 22.60% at 8.43 eV           |
| <b>CdSe</b>     | 6.03%                        | 32.33% at 8.10 eV       | 4.86%                   | 23.30% at 8.04 eV           |
| <b>CdTe</b>     | 7.08%                        | 30.38% at 7.13 eV       | 6.16%                   | 25.04% at 6.89 eV           |
| <b>ZnS/CdS</b>  | 5.89%                        | 30.71% at 8.39 eV       | 4.95%                   | 20.24% at 8.72 eV           |
| <b>ZnS/CdSe</b> | 8.89%                        | 18.21% at 2.56 eV       | 5.90%                   | 18.81% at 9.28 eV           |
| <b>ZnS/CdTe</b> | 11.95%                       | 29.42% at 2.45 eV       | 8.04%                   | 25.05% at 7.65 eV           |
